# Supplementary material for: A novel and simple method yields highly dispersed Au/TS-1 catalysts for enhanced propylene hydro-oxidation
Source: Royal Society of Chemistry journal article supplement (doi:10.1039/d4cc02086c), 2024-01-01
Supplement: d4cc02086c1.pdf [file d4cc02086c1.pdf]

## **Electronic Supplementary Information**

### **A Novel and Simple Method Yields High-Dispersed Au/TS-1 Catalysts for Enhanced Propylene Hydro-Oxidation**

Zihua Zhang, Jialun Xu, Kesheng Xu, Yuxia Zhong, Shudong Shi, Xuezhi Duan\*, and  
Xinggui Zhou\*

State Key Laboratory of Chemical Engineering, East China University of Science and  
Technology, Shanghai 200237, China

\* Corresponding authors: xzduan@ecust.edu.cn; xgzhou@ecust.edu.cn

Tel.: +86-21-64253509; Fax.: +86-21-64253528

## **1 Catalysts preparation**

### **1.1 Synthesis of titaniumsilicate-1**

The TS-1 with a Si/Ti molar ratio of 200 was synthesized as follows: 2.00 g of Tween-20 was firstly added to a beaker containing 30.00 g of H<sub>2</sub>O and stirred magnetically for 1 h at room temperature. Subsequently, 26.36 g of tetrapropylammonium hydroxide (TPAOH, 25 wt%) was added into the above solution and stirred for another 1 h. Following this, 37.5 g of tetraethyl orthosilicate (TEOS, 99.8%) was introduced and stirred for 1 h. Concurrently, 0.31 g of titanium butoxide (TBOT, 99.99) was dispersed in 10 g isopropanol (IPA, 99.5%) and stirred magnetically for 45 minutes. Thereafter, the TBOT and IPA mixture was added dropwise into the above-mentioned mixture using a syringe pump. After stirring at room temperature for 1 h, the resulting gel is then heated to 80°C to remove alcohol. After the alcohol evaporation process, the gel was then transferred into a Teflon-lined stainless-steel autoclave (150 ml), which was then crystallized at 165°C for 24 h. The as-synthesized TS-1 After the crystallization process, the resulting slurry was centrifuged and washed. Then the obtained sample was dried at 70°C for 6 h in a convection oven. Finally, the as-obtained solid was placed in a muffle furnace and calcined at 550 °C for 5 h in air. For the uncalcined TS-1 (i.e., TS-1-B) with a Si/Ti ratio of 100, the synthesis process is similar to that of the TS-1(200), with the key difference being the absent of calcination process.

### **1.2 Synthesis of catalysts**

The process for preparing Au/TS-1 catalyst by the modified incipient wetness impregnation method (denoted as m-IWI) was as follows: 0.500 g of TS-1(200) was firstly placed in a PTFE crucible, then 0.200 mL of HAuCl<sub>4</sub> (12.70 mM) solution was added dropwise into the TS-1 solid, and 0.200 mL of Cs<sub>2</sub>CO<sub>3</sub> (0.05 M) solution was subsequently introduced into the above

slurry by stirring. The impregnated solid powder was aged at room temperature for 6 h and then placed into a dark vacuum dryer for 12 h at room temperature. The as-obtained sample was denoted as x wt% Au/TS-1(m-IWI), where x represents the Au loading. The uncalcined TS-1 immobilized Au catalyst was also prepared via the similar method mentioned above, except for the usage of 0.125 mL of Cs<sub>2</sub>CO<sub>3</sub> solution. The as-obtained sample was denoted as x wt% Au/TS-1-B(m-IWI), where x represents the Au loading. The referenced Au/TS-1 catalyst using HAuCl<sub>4</sub> as Au precursor was also prepared via the similar method mentioned above, except for the addition of Cs<sub>2</sub>CO<sub>3</sub> solution. The as-obtained sample was denoted as x wt% Au/TS-1(IWI), where x represents the Au loading.

The deposition-precipitation method (i.e., DP method) was also used to prepare referenced Au/TS-1 catalyst. Typically, 0.50 g of TS-1 powder was dispersed in 22.0 g ultrapure H<sub>2</sub>O, followed by the addition of 2.50 mL of HAuCl<sub>4</sub> solution (4.80 mM). After stirring for 0.5 h at room temperature, 0.36 ml of Cs<sub>2</sub>CO<sub>3</sub> (1.00 M) solution was added into the above slurry. After aging at room temperature for 5 h, the obtained slurry was centrifuged, washed, and dried for 18 h under vacuum. The as-obtained sample was denoted as x wt% Au/TS-1(DP), where x represents the Au loading.

## 2 Characterization

The Fourier-transform infrared spectroscopy (FT-IR) spectra of the three catalysts prepared by different methods were collected on a PerkinElmer Spectrum 100 FT-IR spectrometer. Prior to analysis, samples were first mixed with KBr and then pressed into pellets. The electronic properties of Au/TS-1 catalysts were analyzed by X-ray photoelectron spectroscopy (XPS) on a Kratos Axis XSAM-800 instrument, which employed Al K $\alpha$  X-ray (1486.6 eV) as the excitation source. The internal standard of the C<sub>1s</sub> peak was set as 284.6 eV. The Au loadings of Au-Ti

bifunctional catalysts were determined using an Agilent 725 inductively coupled plasma atomic emission spectrometer (ICP-AES). Prior to analysis, the samples were fully digested in a mixture of aqua regia and hydrofluoric acid. The images of Au particle over the Au-Ti bifunctional catalysts were obtained using a high-angle annular dark field-scanning transmission electron microscope (HAADF-STEM), which was performed on FEI Tecnai G2 F20 S-TWIN transmission electron microscope. The average Au particles size and the size distribution of Au nanoparticles over the Au-Ti bifunctional catalysts were obtained based on at least 200 randomly selected Au nano-particles. The Aberration-corrected high-angle annular dark-field scanning transmission electron microscope was performed on FEI Titan Cubed Themis G2 300 with a spherical aberration corrector working at 200 kV.

### **3 Catalytic tests**

Catalytic testing was conducted in a quartz tubular reactor (inner diameter of ~ 6 mm) at normal pressure. For the TS-1 immobilized Au catalysts (e.g., Au/TS-1(m-IWI), Au/TS-1(DP)), 0.15 g catalyst of 100 mesh size was loaded in the reactor. Subsequently, the reactor was heated from room temperature to 190 °C (0.5°C/min) in a gas mixture of C<sub>3</sub>H<sub>6</sub>: O<sub>2</sub>: H<sub>2</sub>: N<sub>2</sub> =1:1:1:7 (flow rate of 35 mL·min<sup>-1</sup>) and then kept at 190 °C for catalytic testing. The Au/TS-1-B (m-IWI) catalyst was pre-treated prior to the propylene epoxidation. Typically, 0.15 g Au/TS-1-B(m-IWI) catalyst of 100 mesh size was firstly loaded in the reactor, and then the reactor was heated from room temperature to 350 °C (heating rate of 1 °C /min) in a feed of H<sub>2</sub>/N<sub>2</sub> mixture with the flow rate of 18/32 mL/min and kept for 2 h. Subsequently, the reactor was cooled down to 200 °C and the feed gases were switched to C<sub>3</sub>H<sub>6</sub>/H<sub>2</sub>/O<sub>2</sub>/N<sub>2</sub> with the flow rate of 3.5/3.5/3.5/24.5 mL/min for the catalytic testing.

The reactor gas effluent was analyzed hourly by using an on-line GC equipped with TCD (TDX-01 column) and FID (Rt-QS-BOND column), which uses N<sub>2</sub> as the carrier gas. The

propylene, ethanal, PO, acetone, acrolein and propanal were analyzed by FID, and the H<sub>2</sub>, O<sub>2</sub> and CO<sub>2</sub> were detected by TCD. The conversion of propylene, selectivity toward products and H<sub>2</sub> efficiency were calculated as below:

Propylene conversion = moles of (C<sub>3</sub>-oxygenates + 2/3 ethanal + 1/3 CO<sub>2</sub>)/moles of propylene in the feed.

C<sub>3</sub>-oxygenates selectivity = moles of C<sub>3</sub>-oxygenates/moles of (C<sub>3</sub>-oxygenates + 2/3 ethanal + 1/3 CO<sub>2</sub>).

Ethanal selectivity = 2/3 (moles of ethanal)/moles of (C<sub>3</sub>-oxygenates + 2/3 ethanal + 1/3 CO<sub>2</sub>).

CO<sub>2</sub> selectivity = 1/3 (moles of CO<sub>2</sub>)/moles of (C<sub>3</sub>-oxygenates + 2/3 ethanal + 1/3 CO<sub>2</sub>).

H<sub>2</sub> efficiency = moles of PO/moles of H<sub>2</sub> converted.

**Table S1.** Au loadings and uptake efficiency of Au/TS-1 catalysts prepared by different methods

| Catalysts      | Theoretical      | Practical        | Au uptake efficiency (%) |
|----------------|------------------|------------------|--------------------------|
|                | Au loading (wt%) | Au loading (wt%) |                          |
| Au/TS-1(m-IWI) | 0.10             | 0.098            | 98.0                     |
| Au/TS-1(IWI)   | 0.10             | 0.097            | 97.0                     |
| Au/TS-1(DP)    | 4.75             | 0.093            | 2.2                      |

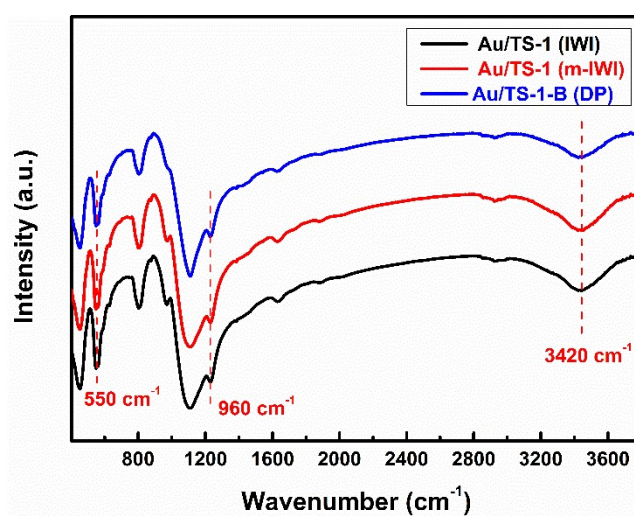

Fig. S1. FT-IR spectra of three Au/TS-1 catalysts prepared by different methods.

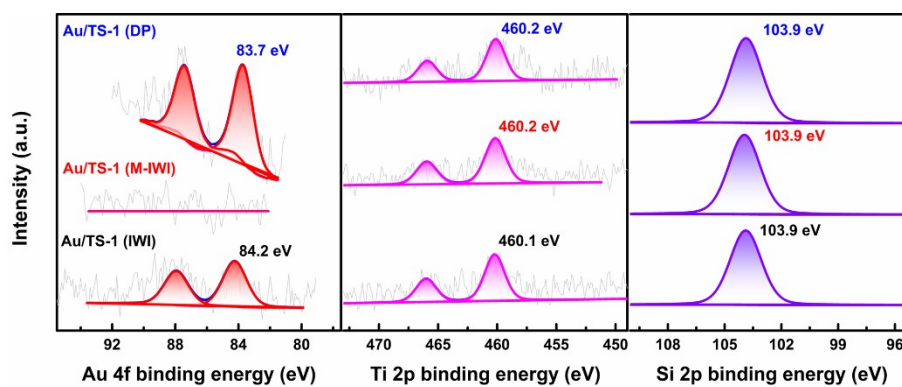

Fig. S2. XPS spectra of Au/TS-1 catalysts prepared by different methods.

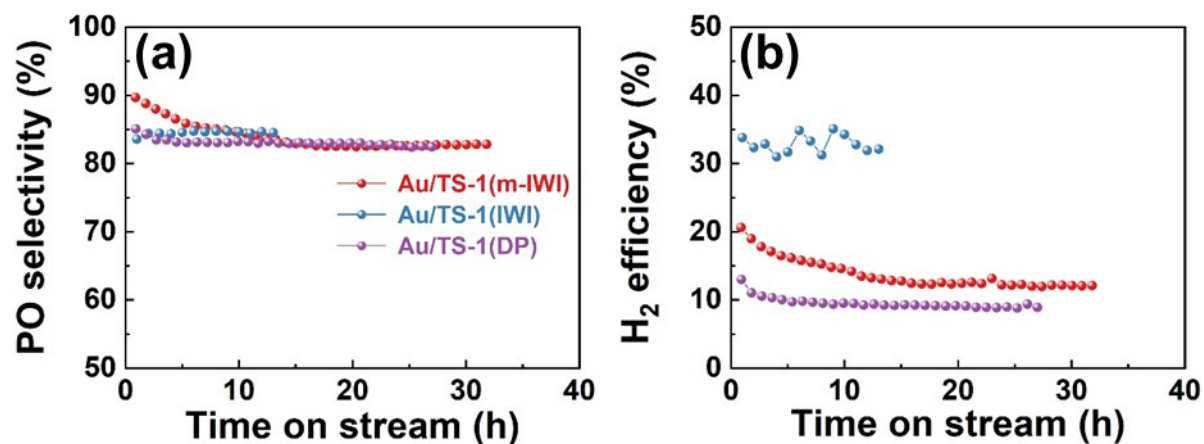

Fig. S3 (a) PO selectivity and (b) hydrogen efficiency of the 0.10 wt% Au/TS-1 catalysts prepared by different methods.

Reaction temperature: 190 °C, C<sub>3</sub>H<sub>6</sub> concentration: 10% Vol.

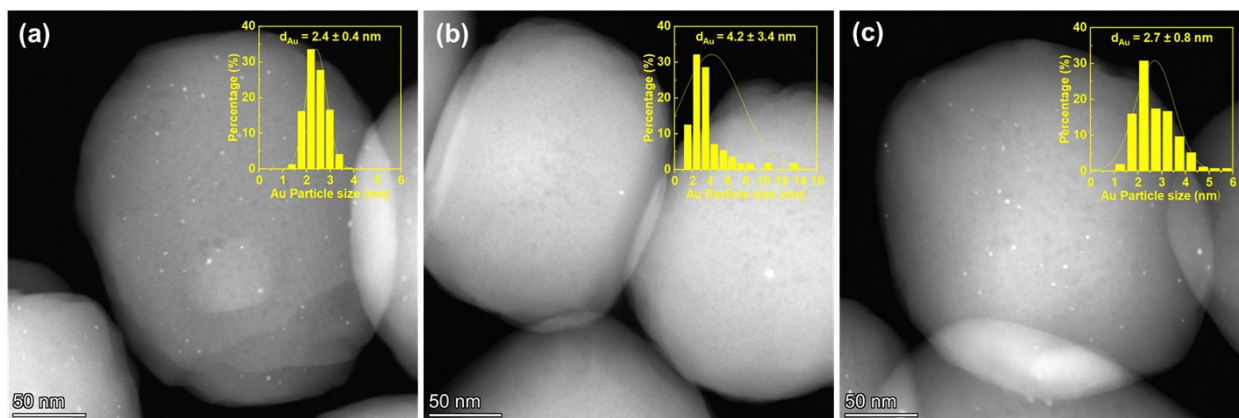

Fig. S4 Representative HAADF-STEM images of (a) 0.10 wt.% Au/TS-1(m-IWI), (b) 0.10 wt.% Au/TS-1(IWI) and (c) 0.10 wt.% Au/TS-1(DP) catalysts. The insets show the Au nanoparticle size distributions of the corresponding catalysts.

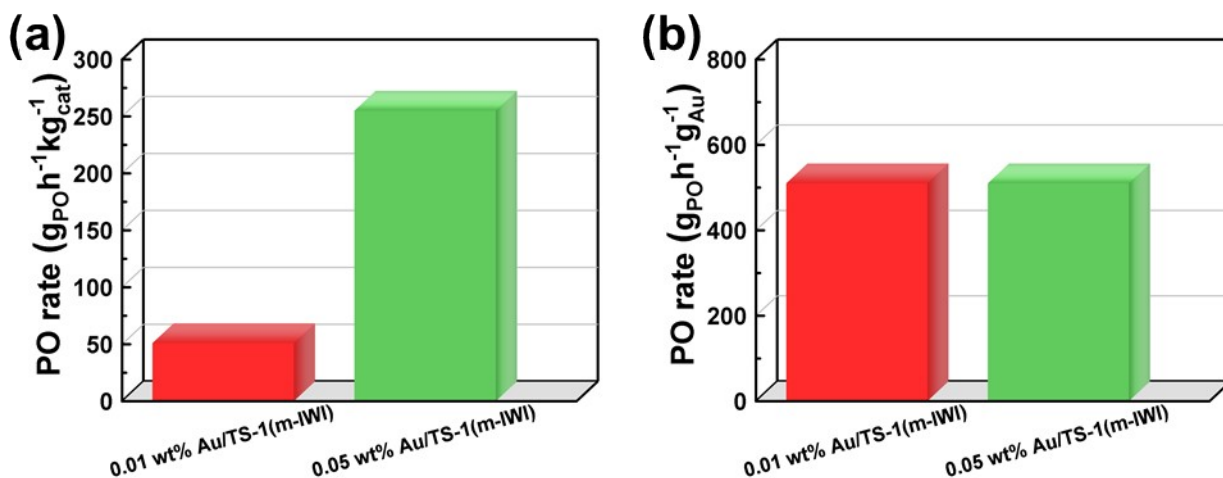

Fig. S5 (a) PO formation rate and (b) gold atom efficiency of the 0.01 wt% Au/TS-1(m-IWI) and 0.05 wt% Au/TS-1(m-IWI) catalysts. Reaction temperature: 190 °C,  $\text{C}_3\text{H}_6$  concentration: 10% Vol.

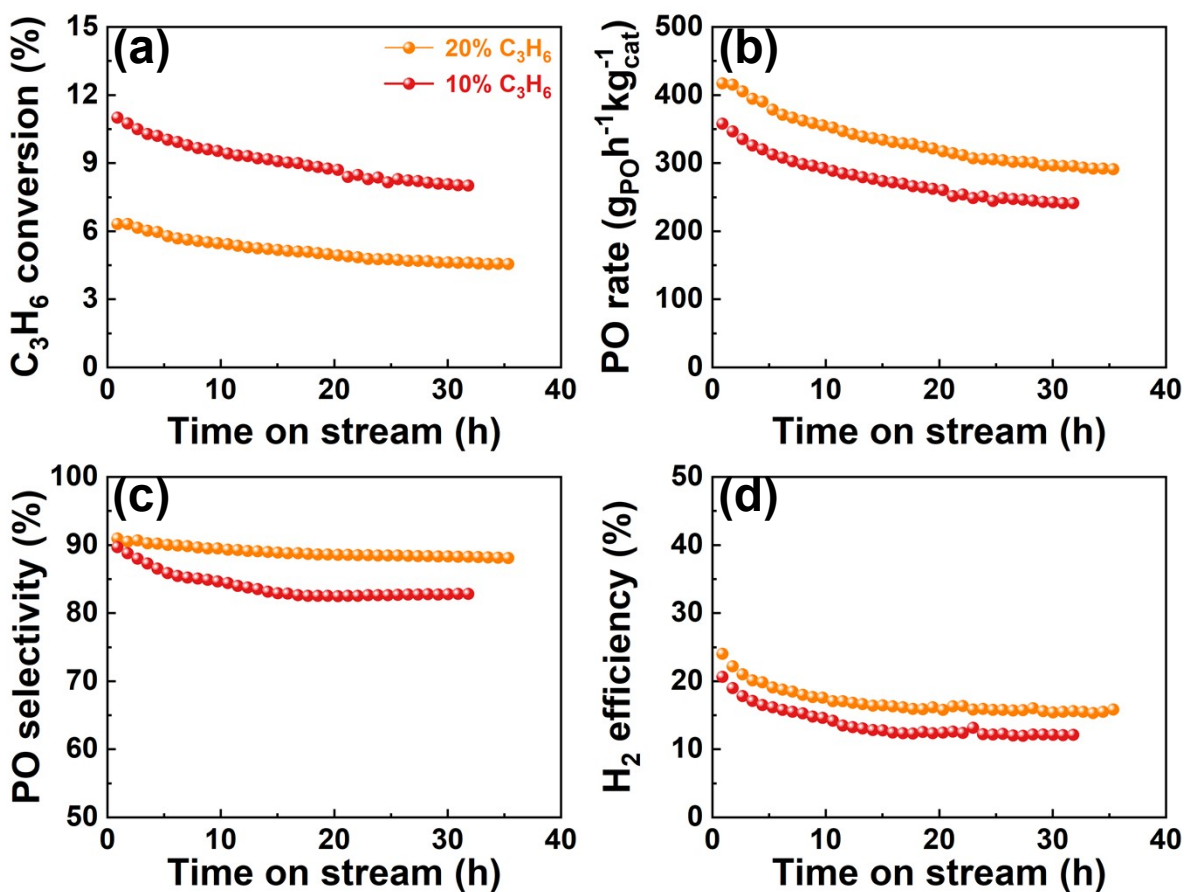

Fig. S6 (a) Conversion of propylene, (b) PO formation rate, (c) PO selectivity and (d) hydrogen efficiency of 0.10 wt.% Au/TS-1(m-IWI) catalyst under different  $\text{C}_3\text{H}_6$  concentrations. Reaction temperature: 190 °C.



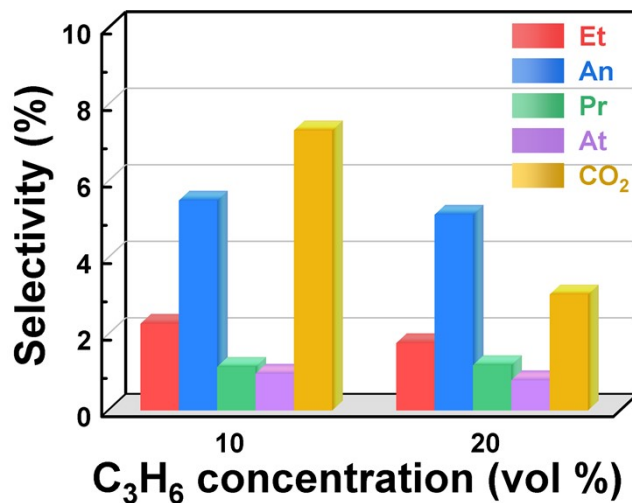

**Fig. S7** Comparison of byproducts distribution of 0.10 wt.% Au/TS-1(m-IWI) catalyst under different C<sub>3</sub>H<sub>6</sub> concentrations. Reaction temperature: 190 °C.

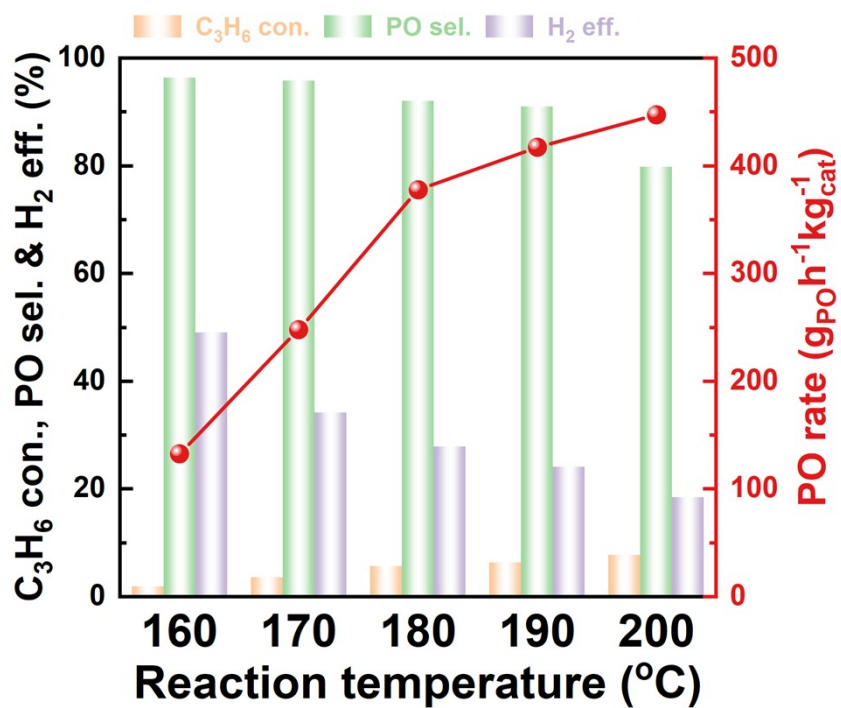

**Fig. S8** Effect of reaction temperature on the catalytic performance of 0.10 wt.% Au/TS-1 0(m-IWI) catalyst. C<sub>3</sub>H<sub>6</sub> concentration: 20% Vol.

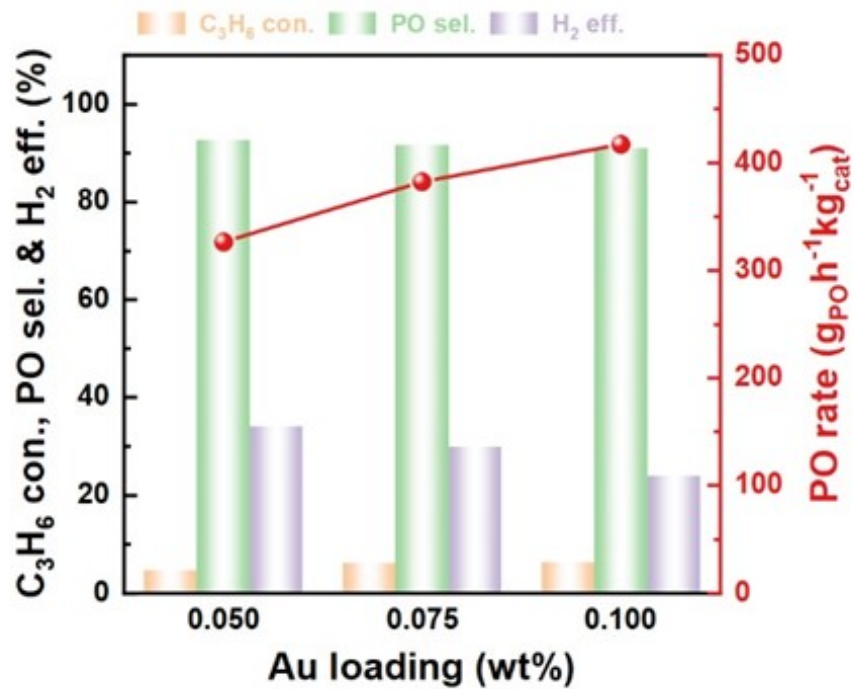

**Fig. S9** Effect of Au loading on the catalytic performance of Au/TS-1(m-IWI) catalysts. Reaction temperature: 190 °C, C<sub>3</sub>H<sub>6</sub> concentration: 20% Vol.

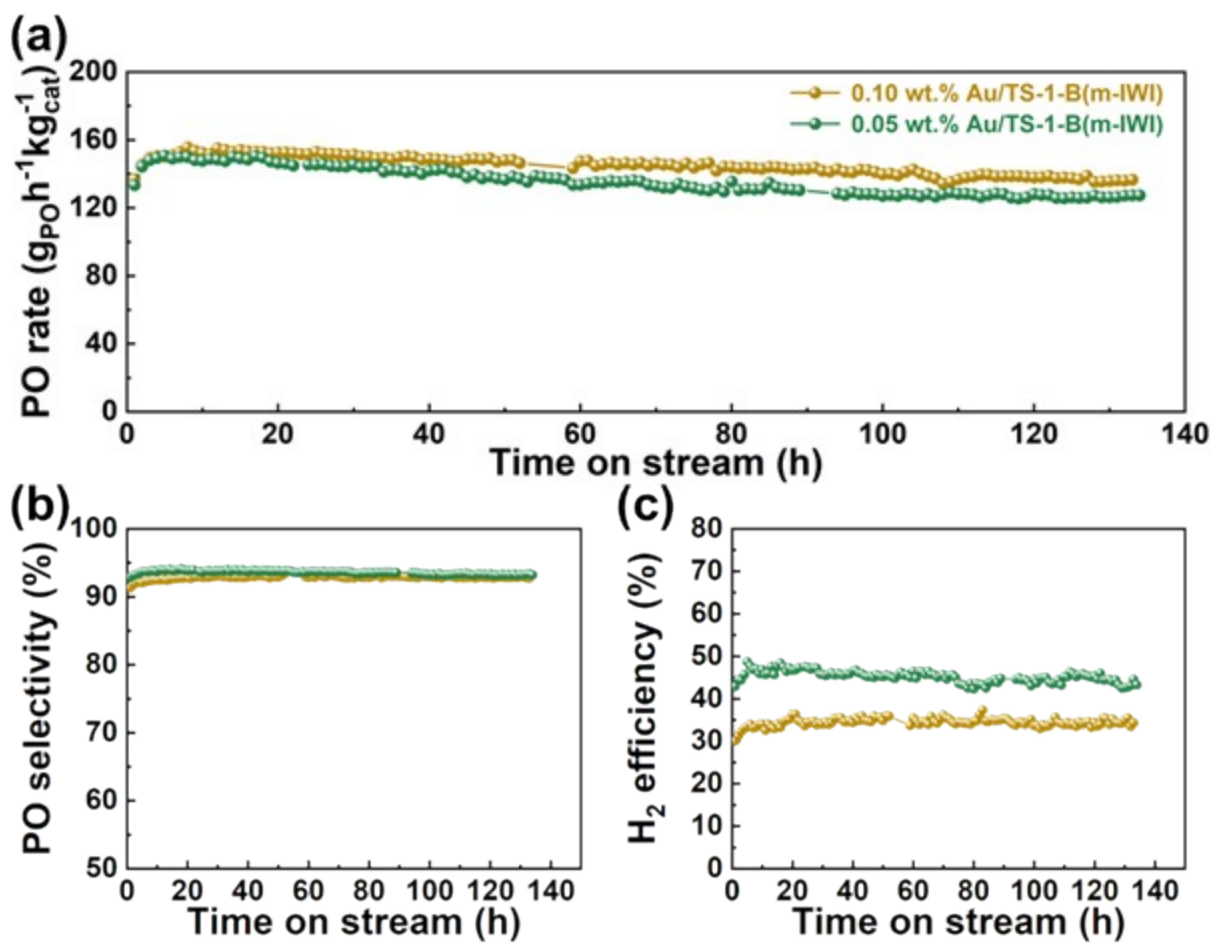

Fig. S10 The PO formation rate (a) and selectivity (b), as well as hydrogen efficiency (c) of the Au/TS-1-B(m-IWI) catalyst with different Au loadings. Reaction temperature: 200 °C,  $\text{C}_3\text{H}_6$  concentration: 10% Vol.

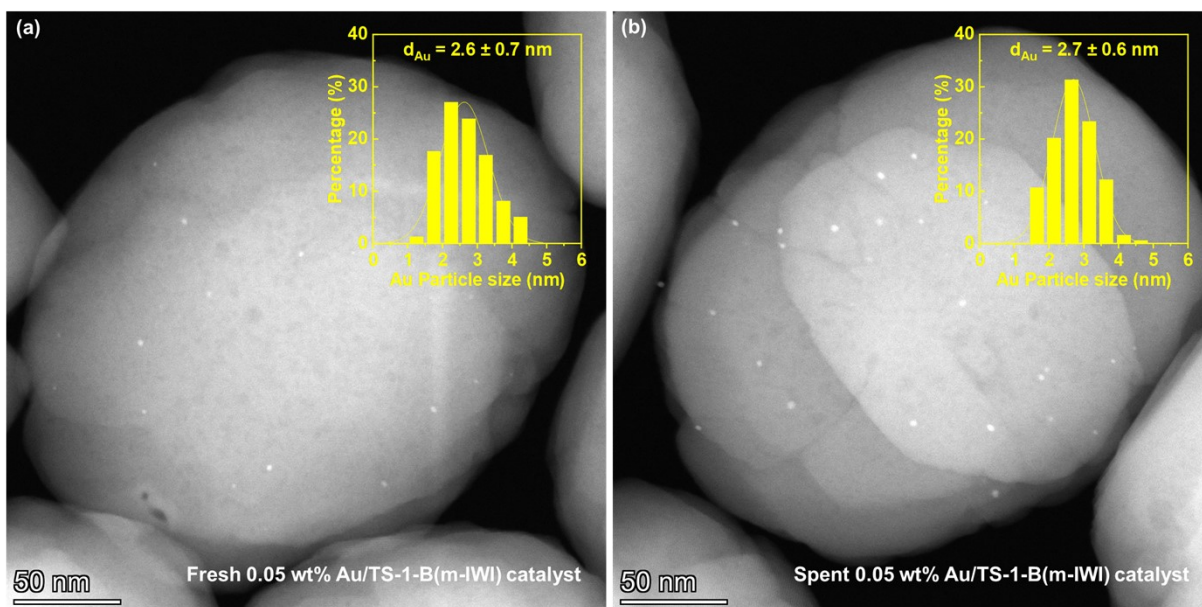

**Fig. S11** Representative HAADF-STEM images of fresh and spent 0.05 wt% Au/TS-1-B(m-IWI) catalyst. The insets show the Au nanoparticle size distributions of the corresponding catalysts.
